# Supplementary material for: Dietary Advice and Collaborative Working: Do Pharmacists and Allied Health Professionals Other Than Dietitians Have a Role?
Source: Healthcare (Basel). 2015 Feb 12;3(1):64–77. doi: 10.3390/healthcare3010064 (PMC4934524; doi:10.3390/healthcare3010064)
Supplement: Supplementary File 1 [file healthcare-03-00064-s001.zip]

Archive with 6 entries (5 files):
- supplementary files/
- supplementary files/Focus-1 Diagnostic Radiographers.pdf
- supplementary files/Focus-2 Paramedics.pdf
- supplementary files/Focus-3 Radiotherapists.pdf
- supplementary files/Focus-4 Pharmacists.pdf
- supplementary files/Focus-5 Physiotherapists.pdf
